# Supplementary material for: On Bounding the Bandwidth of Graphs with Symmetry
Source: Atypon-hosted journal article supplement (doi:10.1287/ijoc.2014.0611), 2014-10-31
Supplement: ijoc.2014.0611-sm.pdf [file ijoc.2014.0611-sm.pdf]

# Online supplement to: “On bounding the bandwidth of graphs with symmetry”

E.R. van Dam\*      R. Sotirov†

**Lemma 3** (see Section 4.3). *The action of  $\mathcal{H}(B(\beta))$  has 12 orbitals.*

*Proof.* In the following, we will consider an edge  $(s_1, s_2)$  in the cut graph (without loss of generality  $s_1 \in S_1$  and  $s_2 \in S_2$ ). Because of the simple structure of the cut graph,  $\mathcal{H}(B(\beta))$  can be easily described. Indeed, because  $s_1$  and  $s_2$  are fixed by  $P \in \text{stab}((s_1, s_2), B)$ , the sets  $S_1 \setminus \{s_1\}$  and  $S_2 \setminus \{s_2\}$  are fixed (as sets) by  $P(\beta) \in \mathcal{H}(B(\beta))$ . This implies that  $\mathcal{H}(B(\beta))$  is the direct product of the symmetric groups on  $S_1 \setminus \{s_1\}$ ,  $S_2 \setminus \{s_2\}$ , and  $S_3$ . In fact, this is the full automorphism group of  $B(\beta)$  in case  $m_1 \neq m_2$  (in the case that  $m_1 = m_2$  it is an index 2 subgroup of  $\text{aut}(B(\beta))$  since the ‘swapping’ of  $S_1 \setminus \{s_1\}$  and  $S_2 \setminus \{s_2\}$  is not allowed). Therefore, the action of  $\mathcal{H}(B(\beta))$  on  $\beta$  has 12 orbitals, similar as described in Example 1.  $\square$

**Proposition 3** (see Section 4.3). *Let  $r_1, r_2, s_1, s_2 \in \{1, \dots, n\}$ ,  $\alpha = \{1, \dots, n\} \setminus \{r_1, r_2\}$ ,  $\beta = \{1, \dots, n\} \setminus \{s_1, s_2\}$ , and  $\hat{C}(\alpha, \beta) = 2A(\alpha, r_1)B(s_1, \beta) + 2A(\alpha, r_2)B(s_2, \beta)$ . Then*

$$\mathcal{H}(B(\beta)) \otimes \mathcal{H}(A(\alpha))$$

*is a subgroup of the automorphism group of  $B(\beta) \otimes A(\alpha) + \text{Diag}(\text{vec}(\hat{C}(\alpha, \beta)))$ .*

*Proof.* Let  $P_B \in \mathcal{H}(B(\beta))$  and  $P_A \in \mathcal{H}(A(\alpha))$ . It is clear that  $P_B \otimes P_A$  is an automorphism of  $B(\beta) \otimes A(\alpha)$ , so we may restrict to showing that is also an automorphism of  $\text{Diag}(\text{vec}(\hat{C}(\alpha, \beta)))$ . In order to show this, we will use that for  $i = 1, 2$  we have that

$$P_A^T \text{Diag}(A(\alpha, r_i)) P_A = \text{Diag}(A(\alpha, r_i)) \quad \text{and} \quad P_B^T \text{Diag}(B(\beta, s_i)) P_B = \text{Diag}(B(\beta, s_i)).$$

Indeed, the first equation is equivalent to the (valid) property that  $a_{\pi(j)r_i} = a_{jr_i}$  for all  $j \neq r_1, r_2$  and all automorphisms  $\pi$  of  $A$  that fix both  $r_1$  and  $r_2$ , and the second equation is similar. Because  $\text{vec}(\hat{C}(\alpha, \beta)) = 2B(\beta, s_1) \otimes A(\alpha, r_1) + 2B(\beta, s_2) \otimes A(\alpha, r_2)$ , the result now follows from

$$\begin{aligned} & (P_B \otimes P_A)^T \text{Diag}[B(\beta, s_1) \otimes A(\alpha, r_1) + B(\beta, s_2) \otimes A(\alpha, r_2)] (P_B \otimes P_A) \\ &= P_B^T \text{Diag}(B(\beta, s_1)) P_B \otimes P_A^T \text{Diag}(A(\alpha, r_1)) P_A \\ & \quad + P_B^T \text{Diag}(B(\beta, s_2)) P_B \otimes P_A^T \text{Diag}(A(\alpha, r_2)) P_A \\ &= \text{Diag}[B(\beta, s_1) \otimes A(\alpha, r_1) + B(\beta, s_2) \otimes A(\alpha, r_2)], \end{aligned}$$

where we have used the properties in (1) of the Kronecker product.  $\square$

---

\*Department of Econometrics and OR, Tilburg University, The Netherlands. [edwin.vandam@uvt.nl](mailto:edwin.vandam@uvt.nl)

†Department of Econometrics and OR, Tilburg University, The Netherlands. [r.sotirov@uvt.nl](mailto:r.sotirov@uvt.nl)

## Appendices

### A \*-isomorphism from Example 1

The associated \*-isomorphism  $\varphi$  satisfies:

$$\begin{aligned}
\varphi(B_1) &= \begin{pmatrix} 1 & & & & & \\ & 0 & & & & \\ & & 0 & & & \\ & & & 1 & 0 & 0 \\ & & & 0 & 0 & 0 \\ & & & 0 & 0 & 0 \end{pmatrix}, & \varphi(B_2) &= \begin{pmatrix} -1 & & & & & \\ & 0 & & & & \\ & & 0 & & & \\ & & & m_1-1 & 0 & 0 \\ & & & 0 & 0 & 0 \\ & & & 0 & 0 & 0 \end{pmatrix}, \\
\varphi(B_3) &= \sqrt{m_1 m_2} \begin{pmatrix} 0 & & & & & \\ & 0 & & & & \\ & & 0 & & & \\ & & & 0 & 1 & 0 \\ & & & 0 & 0 & 0 \\ & & & 0 & 0 & 0 \end{pmatrix}, & \varphi(B_4) &= \sqrt{m_1 m_3} \begin{pmatrix} 0 & & & & & \\ & 0 & & & & \\ & & 0 & & & \\ & & & 0 & 0 & 1 \\ & & & 0 & 0 & 0 \\ & & & 0 & 0 & 0 \end{pmatrix}, \\
\varphi(B_5) &= \sqrt{m_1 m_2} \begin{pmatrix} 0 & & & & & \\ & 0 & & & & \\ & & 0 & & & \\ & & & 1 & 0 & 0 \\ & & & 0 & 0 & 0 \\ & & & 0 & 0 & 0 \end{pmatrix}, & \varphi(B_6) &= \begin{pmatrix} 0 & & & & & \\ & 1 & & & & \\ & & 0 & & & \\ & & & 0 & 0 & 0 \\ & & & 0 & 1 & 0 \\ & & & 0 & 0 & 0 \end{pmatrix}, \\
\varphi(B_7) &= \begin{pmatrix} 0 & & & & & \\ & -1 & & & & \\ & & 0 & & & \\ & & & 0 & & \\ & & & 0 & m_2-1 & 0 \\ & & & 0 & 0 & 0 \end{pmatrix}, & \varphi(B_8) &= \sqrt{m_2 m_3} \begin{pmatrix} 0 & & & & & \\ & 0 & & & & \\ & & 0 & & & \\ & & & 0 & 0 & 0 \\ & & & 0 & 0 & 1 \\ & & & 0 & 0 & 0 \end{pmatrix}, \\
\varphi(B_9) &= \sqrt{m_1 m_3} \begin{pmatrix} 0 & & & & & \\ & 0 & & & & \\ & & 0 & & & \\ & & & 0 & 0 & 0 \\ & & & 0 & 0 & 0 \\ & & & 1 & 0 & 0 \end{pmatrix}, & \varphi(B_{10}) &= \sqrt{m_2 m_3} \begin{pmatrix} 0 & & & & & \\ & 0 & & & & \\ & & 0 & & & \\ & & & 0 & 0 & 0 \\ & & & 0 & 0 & 0 \\ & & & 0 & 1 & 0 \end{pmatrix}, \\
\varphi(B_{11}) &= \begin{pmatrix} 0 & & & & & \\ & 0 & & & & \\ & & 1 & & & \\ & & & 0 & 0 & 0 \\ & & & 0 & 0 & 0 \\ & & & 0 & 0 & 1 \end{pmatrix}, & \varphi(B_{12}) &= \begin{pmatrix} -1 & & & & & \\ & 0 & & & & \\ & & 0 & & & \\ & & & 0 & 0 & 0 \\ & & & 0 & 0 & 0 \\ & & & 0 & 0 & m_3-1 \end{pmatrix}.
\end{aligned}$$

### B Symmetry reduction of $\text{MC}_{\text{fix}}^h$

Let  $G$  be an undirected graph on  $n$  vertices with adjacency matrix  $A$  and  $t$  orbitals  $\mathcal{O}_h$  ( $h = 1, 2, \dots, t$ ). Let  $(s_1, s_2)$  be an arbitrary edge in the cut graph  $G_{m_1, m_2, m_3}$  with the adjacency matrix  $B$ , and  $(r_{h1}, r_{h2})$  be an arbitrary pair of vertices in  $\mathcal{O}_h$  ( $h = 1, 2, \dots, t$ ). We let  $\alpha^h = \{1, \dots, n\} \setminus \{r_{h1}, r_{h2}\}$  and  $\beta = \{1, \dots, n\} \setminus \{s_1, s_2\}$ . Now, the relaxation  $\text{MC}_{\text{fix}}^h$

(see Section 4.2) reduces to

$$\begin{aligned}
\min \quad & \frac{1}{2} \sum_{i=1}^d \sum_{j=1}^{12} p_i^{-1} \operatorname{tr}(A(\alpha^h) A_i) x_j^{(i)} \\
& + \sum_{i \in \mathcal{I}_A} \sum_{j \in \{1,6,11\}} (q_j p_i)^{-1} B(\beta, s_1)^T \operatorname{diag}(B_j) A(\alpha^h, r_{h1})^T \operatorname{diag}(A_i) x_j^{(i)} \\
& + \sum_{i \in \mathcal{I}_A} \sum_{j \in \{1,6,11\}} (q_j p_i)^{-1} B(\beta, s_2)^T \operatorname{diag}(B_j) A(\alpha^h, r_{h2})^T \operatorname{diag}(A_i) x_j^{(i)} + \frac{1}{2} d^h \\
\text{s.t.} \quad & \sum_{i \in \mathcal{I}_A} x_1^{(i)} = q_1, \quad \sum_{i \in \mathcal{I}_A} x_6^{(i)} = q_6, \quad \sum_{i \in \mathcal{I}_A} x_{11}^{(i)} = q_{11} \\
& \sum_{i=1}^d \sum_{j=1}^{12} q_j^{-1} x_j^{(i)} B_j = J_{n-2} \\
& \sum_{j=1}^{12} x_j^{(i)} = p_i, \quad i = 1, \dots, d \\
& \sum_{i=1}^d \sum_{j=1}^{12} \frac{1}{q_j p_i} x_j^{(i)} (B_j \otimes A_i) \succeq 0 \\
& x_j^{(i)} \geq 0, \quad x_{j^*}^{(i)} = x_j^{(i^*)}, \quad i = 1, \dots, d, \quad j = 1, \dots, 12,
\end{aligned} \tag{1}$$

where  $B_j$  ( $j = 1, \dots, 12$ ) is defined in Example 1, and  $\{A_i : i = 1, \dots, d\}$  spans  $\mathcal{H}(A(\alpha^h))$ . The set  $\mathcal{I}_A := \mathcal{I}_{\mathcal{H}(A(\alpha^h))}$  is as in Definition 1,  $p_i = \operatorname{tr}(J_{n-2} A_i)$ ,  $i = 1, \dots, d$ ,  $q_j = \operatorname{tr}(J_{n-2} B_j)$ ,  $j = 1, \dots, 12$ . The constraint  $x_{j^*}^{(i)} = x_j^{(i^*)}$  requires that the variables  $x_j^{(i)}$  form complementary pairs. The SDP relaxation (1) can be further simplified by exploiting the  $*$ -isomorphism associated to  $\mathcal{H}(B(\beta))$ , see Appendix A.

## C Orbitals in stabilizer subgroups

Table 11: Number of orbitals in  $\mathcal{H}(Q_d(\alpha))$ .

| $d$ | # orbitals |     |     |     |    |
|-----|------------|-----|-----|-----|----|
| 4   | 80         | 100 | 80  | 35  | –  |
| 5   | 140        | 200 | 200 | 140 | 56 |

Table 12: Number of orbitals in  $\mathcal{H}([H(d, q)](\alpha))$ .

| $d$ | $q$ | # orbitals |     |     |     |
|-----|-----|------------|-----|-----|-----|
| 3   | 3   | 135        | 225 | 165 | –   |
| 3   | 4   | 150        | 275 | 220 | –   |
| 3   | 5   | 150        | 275 | 220 | –   |
| 3   | 6   | 150        | 275 | 220 | –   |
| 4   | 3   | 315        | 675 | 825 | 495 |

Table 13: Number of orbitals in  $\mathcal{H}(H_{q_1, q_2, q_3}(\alpha))$

| $q_1$ | $q_2$ | $q_3$ | # orbitals |     |     |     |     |     |     |
|-------|-------|-------|------------|-----|-----|-----|-----|-----|-----|
| 2     | 3     | 3     | 180        | 180 | 60  | 180 | 180 | –   | –   |
| 2     | 3     | 4     | 200        | 180 | 360 | 100 | 200 | 180 | 360 |
| 2     | 3     | 5     | 200        | 180 | 360 | 100 | 200 | 180 | 360 |
| 2     | 4     | 4     | 200        | 220 | 60  | 200 | 220 | –   | –   |
| 3     | 3     | 4     | 150        | 225 | 450 | 225 | 450 | –   | –   |
| 3     | 3     | 5     | 150        | 225 | 450 | 225 | 450 | –   | –   |
| 3     | 4     | 4     | 250        | 275 | 135 | 450 | 495 | –   | –   |
| 3     | 4     | 5     | 250        | 250 | 500 | 225 | 450 | 450 | 900 |

Table 14: Number of orbitals in  $\mathcal{H}([J(v, 3)](\alpha))$  and  $\mathcal{H}([J(v, 4)](\alpha))$ .

| $v$ | $d$ | # orbitals |     |     |     |
|-----|-----|------------|-----|-----|-----|
| 6   | 3   | 88         | 88  | 24  | –   |
| 7   | 3   | 195        | 257 | 90  | –   |
| 8   | 3   | 220        | 333 | 158 | –   |
| 9   | 3   | 227        | 361 | 203 | –   |
| 10  | 3   | 228        | 368 | 220 | –   |
| 11  | 3   | 228        | 369 | 225 | –   |
| 8   | 4   | 220        | 358 | 220 | 46  |
| 9   | 4   | 484        | 916 | 742 | 195 |
